# Supplementary material for: Risk factors for sporadic infection with non-typhoidal Salmonella among children under five years of age in urban area of Kunming City: a matched case-control study
Source: Research Square preprint supplement (doi:10.21203/rs.3.rs-5436204/v1), 2024-12-17
Supplement: Supplementary file 1 [file 97084a4696d6be064eeb3549.docx]

Risk factor questionnaire for NTS infection among children

1 General information

1.1 Questionnaire number □□□

1.2 Case or control □

1.3 Matched number □□□

1.4 Date of symptom onset □□/□□/□□□□ (dd/mm/yyyy)

1.5 Type of pathogen S. typhimurium□ S. enterica□ Other□, specify______

1.6 Family address urban area of Kunming□ outside of urban area of Kunming□

2 Socio-demographic information

2.1 Child’s gender Male□ Female□

2.2 Child’s age □□months

2.3 Child’s ethnics Han□ Other ethnic groups□

2.4 Child’s type School□ Kindergarten□ Diaspora□ Other□, specify______

2.5 How many children (<10 yrs) including this child regularly live in your house? □

3 Patients exposure

3.1 During the 3 days prior to your Child’s illness, was any family member ill with gastro

symptoms? Yes□ No□

3.2 During the 3 days prior to your Child’s illness, did your child visit any friends or relatives

who have gastro symptoms Yes□ No□

3.3 During the 3 days prior to your Child’s illness, did anyone who has gastro symptoms visit

your house? Yes□ No□

3.4 During the 3 days prior to your Child’s illness, did your child’s meet any person with

gastro symptoms at school or kindergarten? Yes□ No□

4 Animal exposure

4.1 Do you keep pets at home? Yes□ (if yes, answer 3.1.1-3.1.3 ) No□

4.1.1 Type of pets Dog□ Cat□ Turtle□ Fish□ Rabbit□ Bird□

Hamsters□ Others□, specify______

4.1.2 Were any of these animal noticeably ill with diarrhea? Yes□ No□

4.1.3 Pet’s food in general? Pet commercial food□ Cooked food□

Raw food□ Others□, specify______

4.2 During the 3 days prior to your Child’s illness, did your child touch animals at zoo?

Yes□ No□

4.3 During the 3 days prior to your Child’s illness, did you child touch animals at pet market?

Yes□ No□

5 Travel history

5.1 During the 3 days prior to your Child’s illness, did your child travel outside of urban area

of Kunming city? Yes□ No□

5.2 During the 3 days prior to your Child’s illness, have your child ever been supermarket?

Yes□ (if yes, answer 4.2.1-4.2.2 ) No□

5.2.1 Take children's shopping cart Yes□ No□

5.3 During the 3 days prior to your Child’s illness, have your child ever been wet market?

Yes□ (if yes, answer 4.3.1) No□

5.3.1 Touch raw meats or eggs or vegetables or fruits Yes□ No□

5.4 During the 3 days prior to your Child’s illness, have your child ever been city park or

wetland? Yes□ (if yes, answer 4.4.1 ) No□

5.4.1 Play with water□, sand□, entertainment facilities□.

6 Water drinking

6.1 Type of household drinking water? Raw tap water□ Boiled tap water□

Bottled water□ Others□, specify______

6.2 During the 3 days prior to your Child’s illness, did your child drink homemade fruit juice?

Yes□ No□

6.3 During the 3 days prior to your Child’s illness, did your child drink selling fruit juice?

Yes□ No□

6.4 During the 3 days prior to your Child’s illness, did your child drink selling milk tea?

Yes□ No□

6.5 During the 3 days prior to your Child’s illness, did your child drink breast milk?

Yes□ No□

6.6 During the 3 days prior to your Child’s illness, did your child drink formula milk?

Yes□ No□

6.7 During the 3 days prior to your Child’s illness, did your child drink fresh milk?

Yes□ No□

6.8 Did you store the remaining milk in the refrigerator?

Yes□ No□

7 Food consumption

7.1 During the 3 days prior to your Child’s illness, have your child ever eat soft boiled eggs?

Yes□ No□

7.2 During the 3 days prior to your Child’s illness, have your child ever eat unwashed fruit?

Yes□ No□

7.3 During the 3 days prior to your Child’s illness, have your child ever eat cold meat?

Yes□ No□

7.4 During the 3 days prior to your Child’s illness, have your child ever eat cold vegetables?

Yes□ No□

7.5 During the 3 days prior to your Child’s illness, have your child ever eat cold rice noodle?

Yes□ No□

7.6 During the 3 days prior to your Child’s illness, have your child ever eat food outside of

home? Restaurant□ School□ Street vendors□ No□

8 Family hygiene practices

8.1 Do your families keep raw eggs in the refrigerator?

Always□ Sometimes□ Never□

8.2 Do your families clean the refrigerator?

Always□ Sometimes□ Never□

8.3 Do your families separate cutting board for raw and cooked food?

Always□ Sometimes□ Never□

8.4 After cooking, do your families wash the cutting board?

Always□ Sometimes□ Never□

8.5 After cooking, do your families clean the kitchen counters after each cooking?

Always□ Sometimes□ Never□

8.6 Do you clean feeding equipment after feeding?

Always□ Sometimes□ Never□

8.7 Do you clean toys of your child?

Always□ Sometimes□ Never□

8.8 Does your child wash hand before eating?

Always□ Sometimes□ Never□
